# Supplementary material for: Initial impact of COVID-19’s stay-at-home order on motor vehicle traffic and crash patterns in Connecticut: an interrupted time series analysis
Source: HighWire-hosted journal article supplement (doi:10.1136/injuryprev-2020-043945), 2020-10-28
Supplement: injuryprev-2020-043945supp001_data_supplement.pdf [file injuryprev-2020-043945supp001_data_supplement.pdf]

## Supplemental Material

Table S1. Impact of COVID-19 on Motor Vehicle Crashes Stratified by Number of Vehicles Included in Crash, Sensitivity Analysis for Stay-at-Home order in 2020

| Outcome Models   | Incidence Rate Ratio (IRR) | 95% Confidence Interval (CI) | P-value |
|------------------|----------------------------|------------------------------|---------|
| All Type Crashes | 1.04                       | (0.86, 1.26)                 | 0.64    |
| Single Vehicle   | <b>2.09</b>                | (1.41, 3.09)                 | <0.01   |
| Multiple Vehicle | <b>0.84</b>                | (0.72, 0.97)                 | 0.02    |
| Any Injury Crash | 1.00                       | (0.81, 1.25)                 | 0.95    |
| Single Vehicle   | <b>1.66</b>                | (1.16, 2.36)                 | <0.01   |
| Multiple Vehicle | <b>0.81</b>                | (0.66, 0.98)                 | 0.03    |
| Non-Injury Crash | 1.05                       | (0.87, 1.27)                 | 0.55    |
| Single Vehicle   | <b>2.32</b>                | (1.50, 3.58)                 | <0.01   |
| Multiple Vehicle | <b>0.85</b>                | (0.73, 0.99)                 | 0.03    |
| Fatal Crash      | 1.28                       | (0.46, 3.52)                 | 0.62    |
| Single Vehicle   | 1.79                       | (0.50, 6.34)                 | 0.37    |
| Multiple Vehicle | 0.78                       | (0.16, 3.79)                 | 0.76    |

Model specified a Poisson distribution of the outcome with a log transformed VMT as population offset. Robust standard errors were specified for a more conservative estimate of coefficients. Model includes linear time, average daily precipitation and average daily highest recorded temperature. Model only includes data from 2020. Stay-at-home order starts on March 16<sup>th</sup> instead of the actual date March 23<sup>rd</sup> to test impact.

Figure S1. Daily Rates of All Type Crashes per 10 Million Vehicle Miles Traveled in Connecticut, 2020-2017

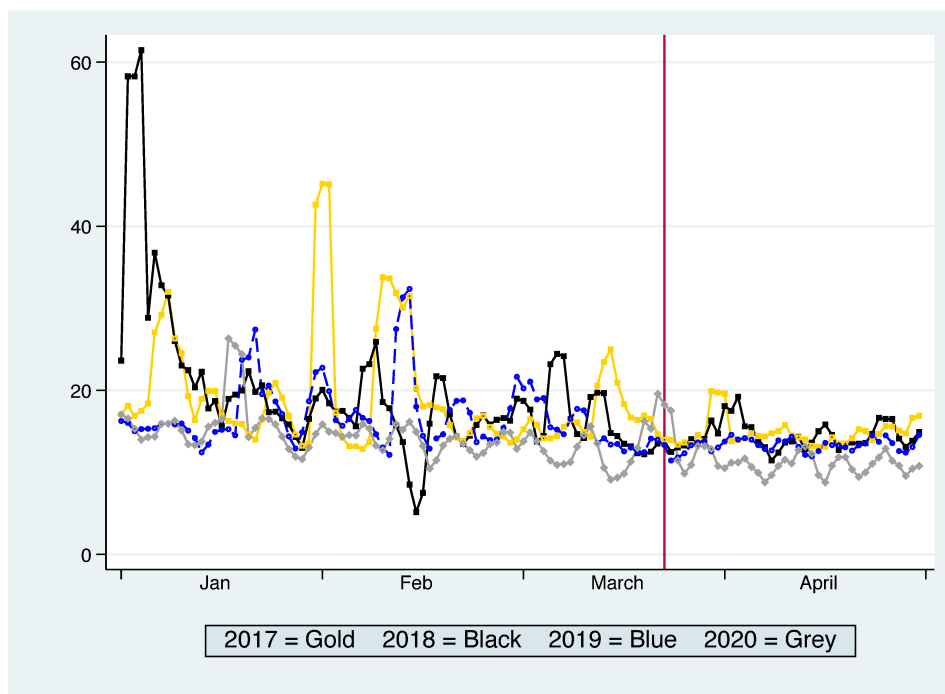

\*Three-day Moving Average

Figure S2. Daily Rates of All Type Crashes, Single Vehicle per 10 Million Vehicle Miles Traveled in Connecticut, 2020-2017

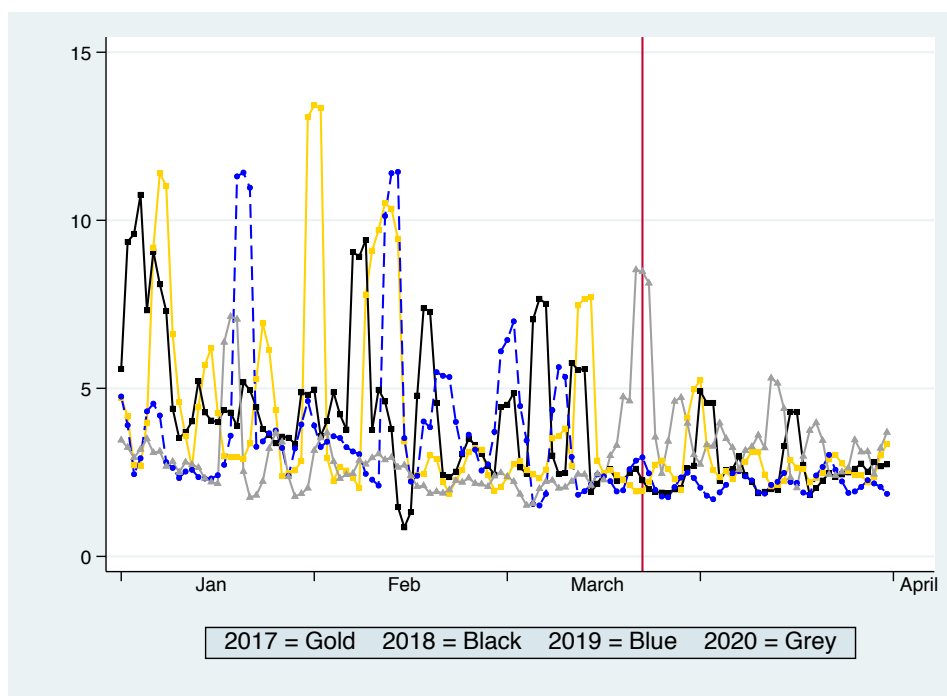

\*Three-day Moving Average

Figure S3, Daily Rates of All Type Crashes, Multiple Car per 10 Million Vehicle Miles Traveled in Connecticut, 2020-2017

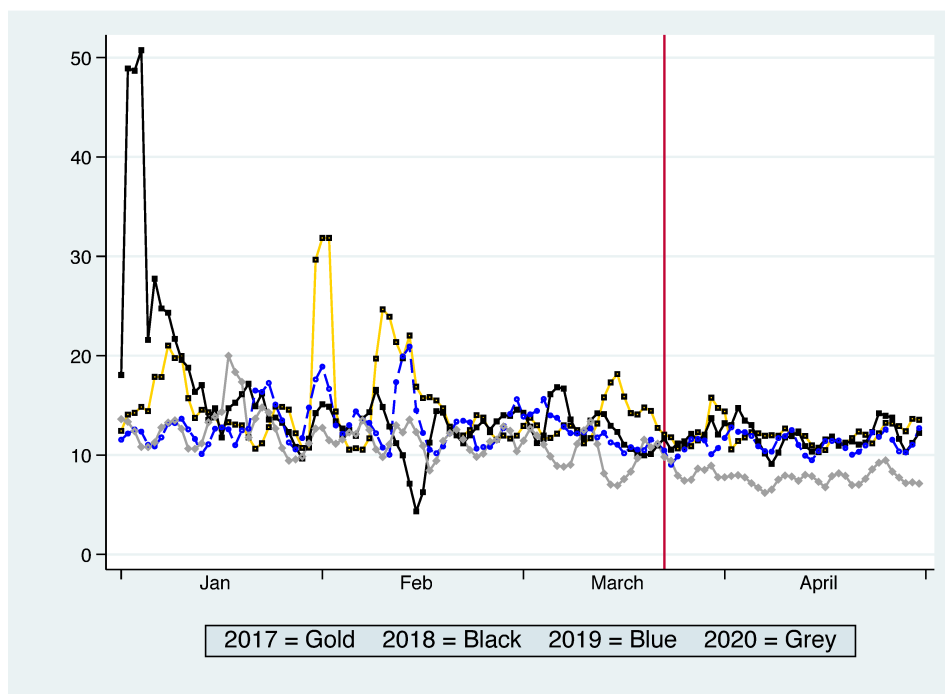

\*Three-day Moving Average

Figure S4, Daily Rates of Any Injury Crashes per 10 Million Vehicle Miles Traveled in Connecticut, 2020-2017

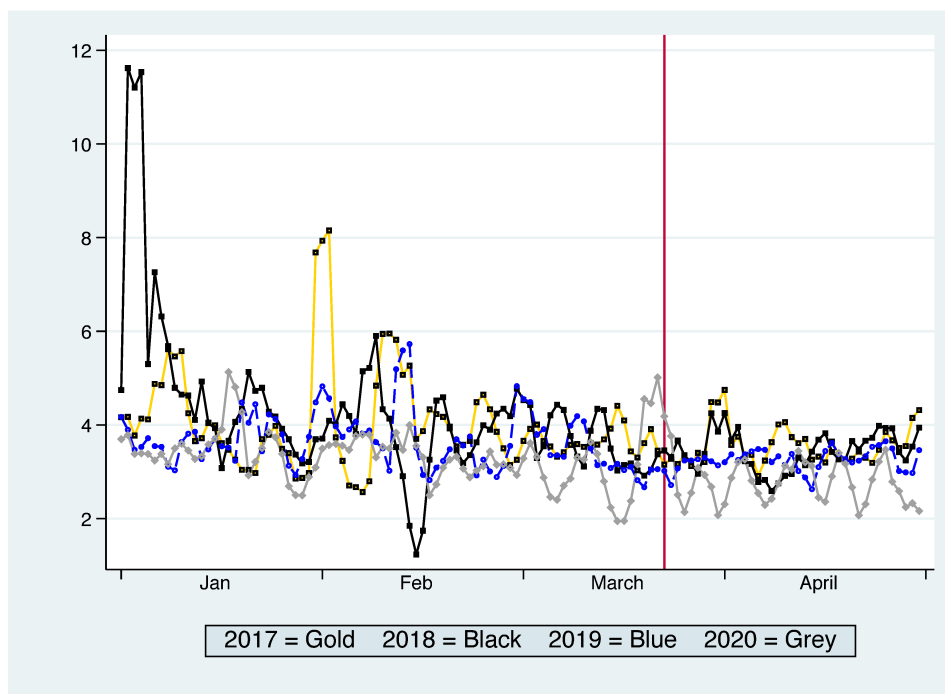

\*Three-day Moving Average

Figure S5, Daily Rates of Any Injury Crashes, Single Vehicle per 10 Million Vehicle Miles Traveled in Connecticut, 2020-2017

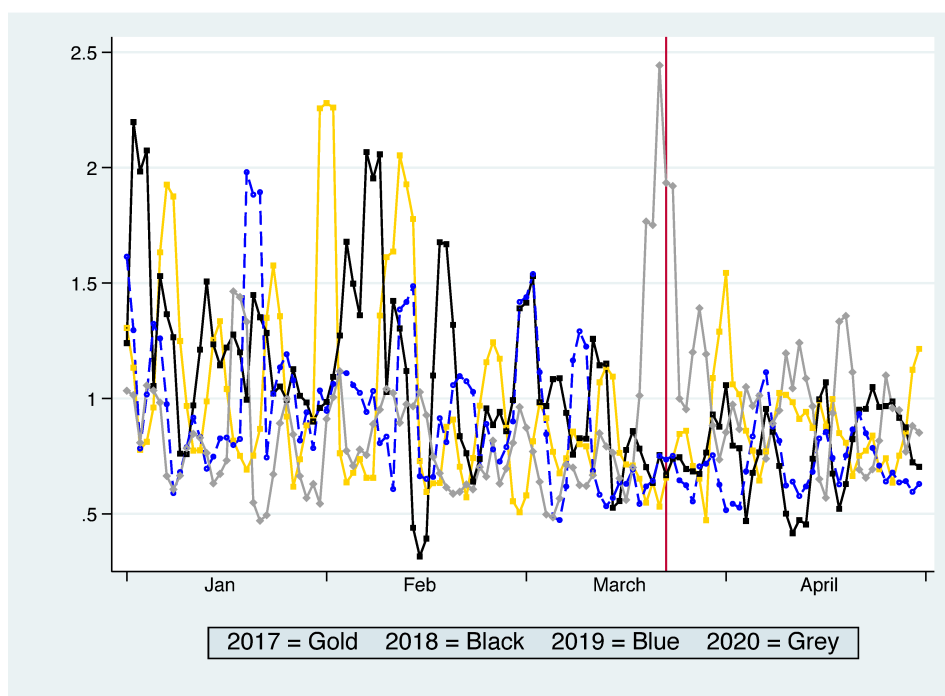

\*Three-day Moving Average

Figure S6, Daily Rates of Any Injury Crashes, Multiple Vehicle per 10 Million Vehicle Miles Traveled in Connecticut, 2020-2017

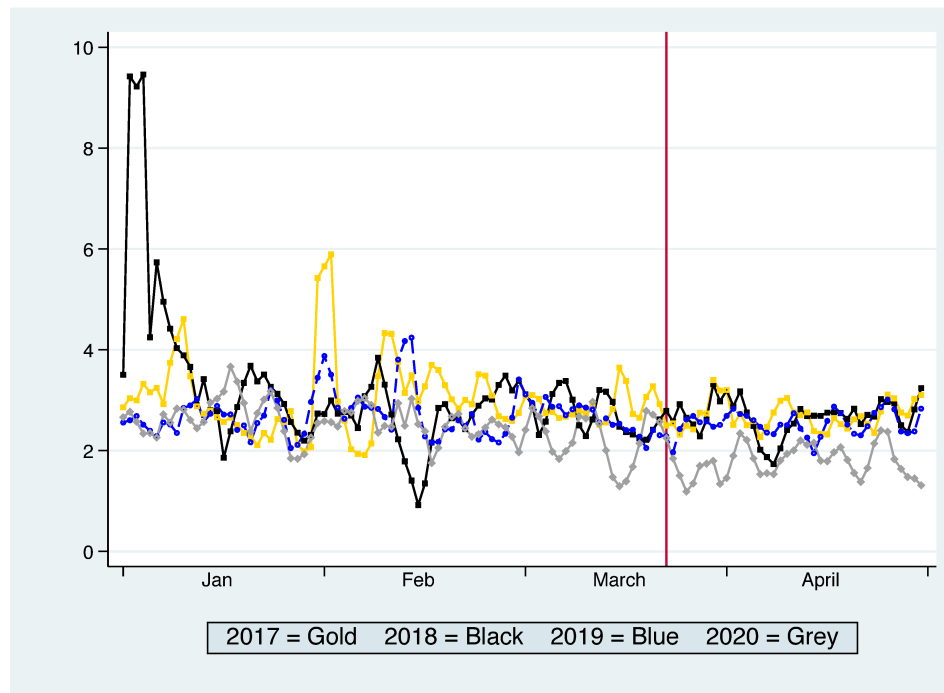

\*Three-day Moving Average

Figure S7, Daily Rates of No Injury Crashes per 10 Million Vehicle Miles Traveled in Connecticut, 2020-2017

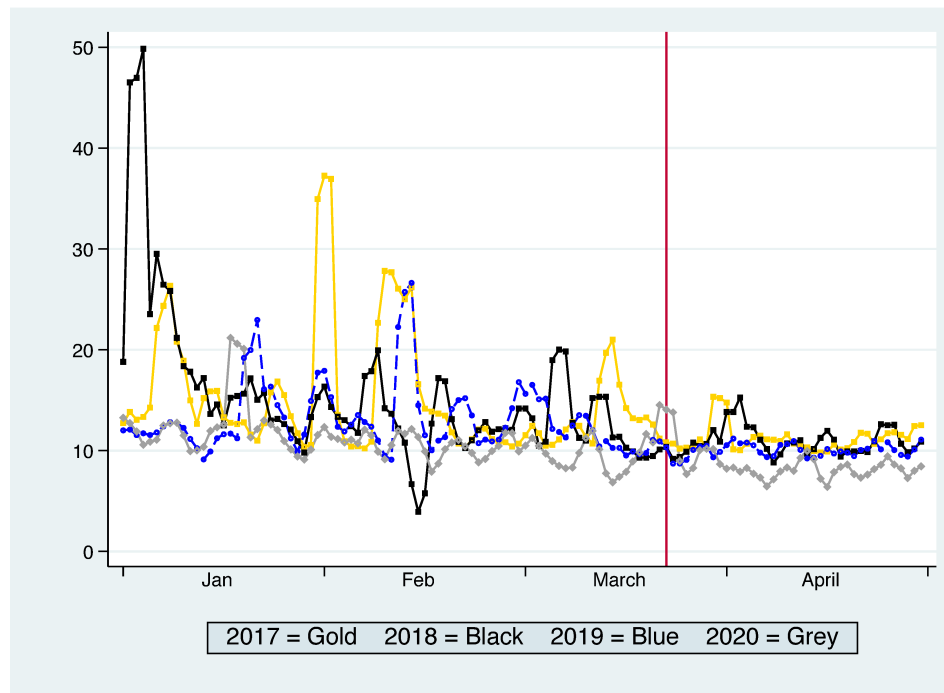

\*Three-day Moving Average



Figure S8, Daily Rates of No Injury Crashes, Single Vehicle per 10 Million Vehicle Miles Traveled in Connecticut, 2020-2017

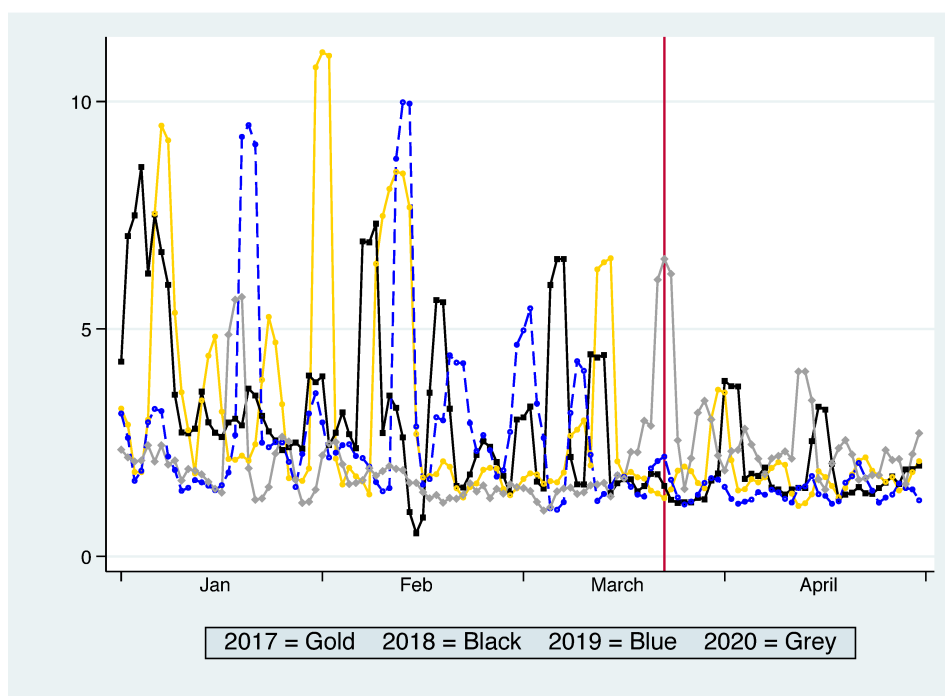

\*Three-day Moving Average

Figure S9, Daily Rates of No Injury Crashes, Multiple Vehicle per 10 Million Vehicle

Miles Traveled in Connecticut, 2020-2017

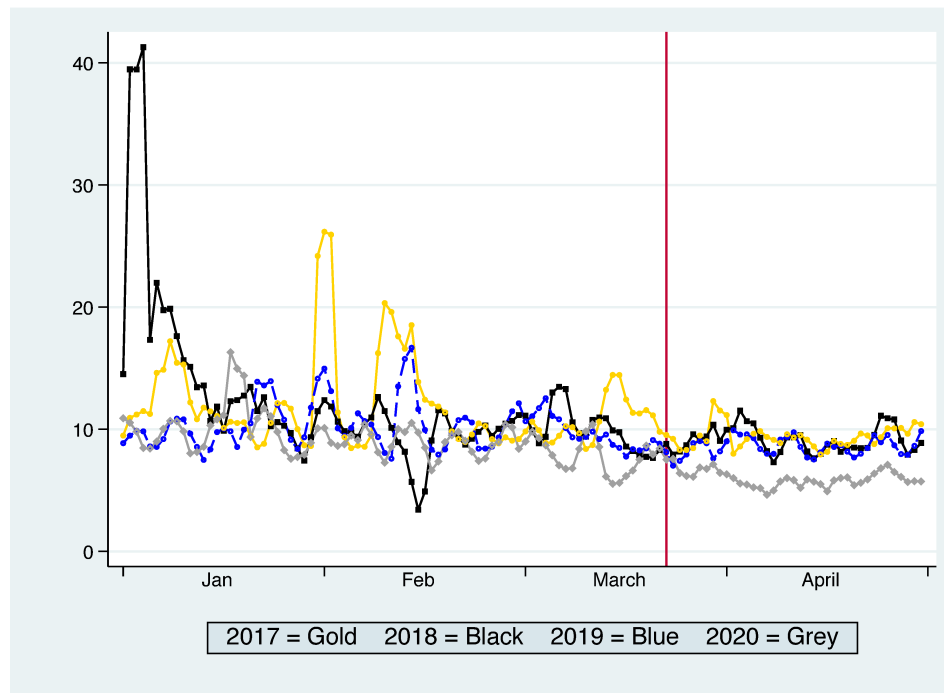

\*Three-day Moving Average

Figure S10, Weekly Rates of Fatal Crashes per 10 Million Vehicle Miles Traveled in Connecticut, 2020-2017

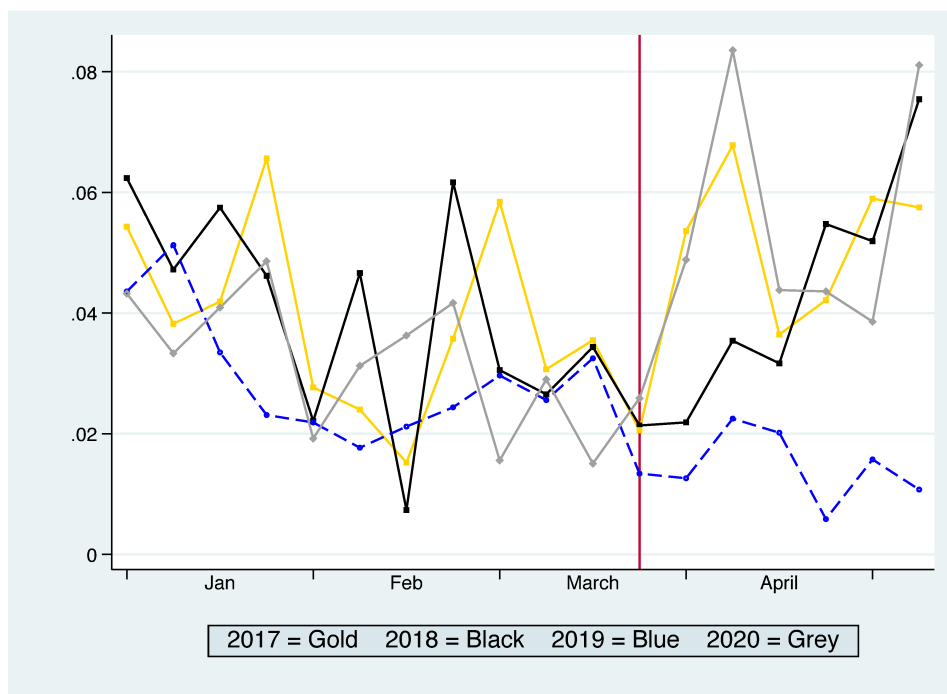

\*Seven-day Moving Average

Figure S11, Weekly Rates of Fatal, Single Vehicle Crashes per 10 Million Vehicle Miles Traveled in Connecticut, 2020-2017

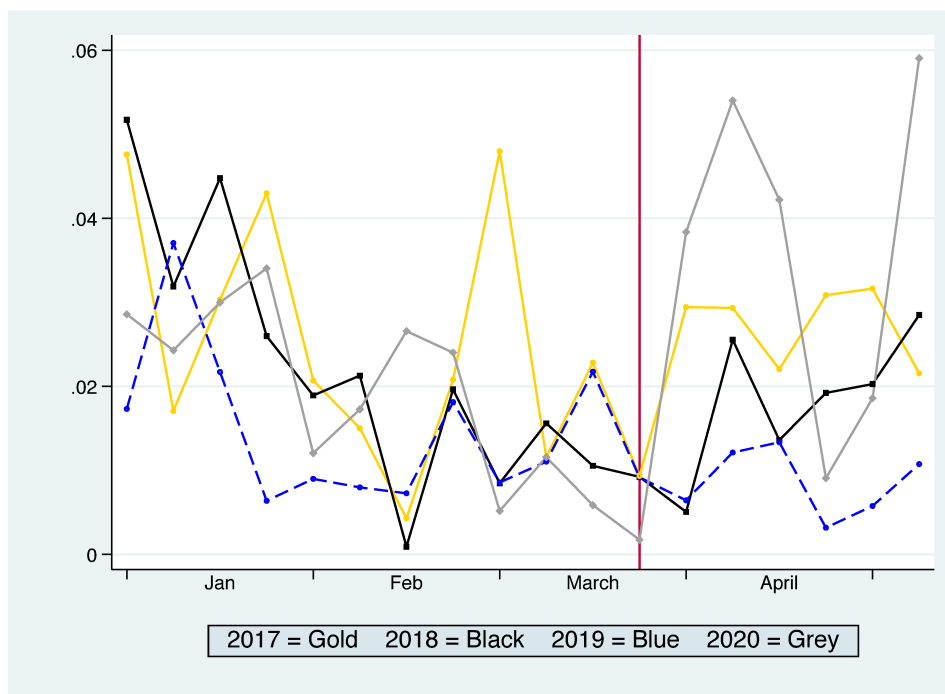

\*Seven-day Moving Average

Figure S12, Weekly Rates of Fatal, Multiple Vehicle Crashes per 10 Million Vehicle Miles Traveled in Connecticut, 2020-2017

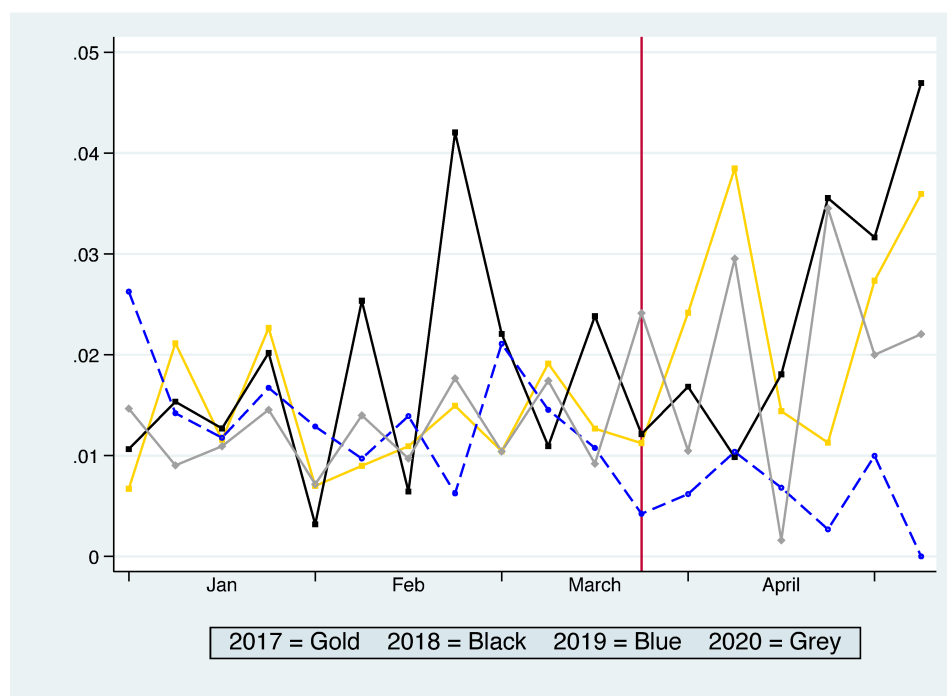

\*Seven-day Moving Average
